# Supplementary material for: Inhibition of Fatty Acid Synthase Upregulates Expression of CD36 to Sustain Proliferation of Colorectal Cancer Cells
Source: PubMed Central journal article supplement (PMC7411002; doi:10.3389/fonc.2020.01185), 2020-07-31
Supplement: Table_1.pdf [file Table_1.pdf]

**Supplementary Table 1. Case Characteristics.**

| <b>Case</b> | <b>Gender</b> | <b>Age</b> | <b>Pathology</b>                                             | <b>Operation</b>             | <b>Staging</b> |
|-------------|---------------|------------|--------------------------------------------------------------|------------------------------|----------------|
| Case 1      | M             | 66         | Invasive moderately differentiated adenocarcinoma            | Low anterior colon resection | T3N1a          |
| Case 2      | F             | 90         | Invasive moderately differentiated colorectal adenocarcinoma | Left hemicolectomy           | T3N0           |
| Case 3      | F             | 68         | Invasive adenocarcinoma involving muscularis propria         | Right hemicolectomy          | T2N0           |
